# Supplementary material for: Molecular evolution of DNMT1 in vertebrates: Duplications in marsupials followed by positive selection
Source: PubMed Central journal article supplement (PMC5886458; doi:10.1371/journal.pone.0195162), 2018-04-05
Supplement: pone.0195162.s001.pdf [file pone.0195162.s001.pdf]

Human 1 MPARTAPARVPTLAVPAISLPDVRRLKDLKEDS--LTKKCKRREKLNLLHEFLQAEVQHQLDLEIKLHKKEELSEEGYLAQVQVQVLLNKLSLENGHAYNREVRNGRLE  
Opossum 1a 1 MPARTGPAFVAAPGSPALQLPPEVRRRLKDLKEDDILTEKEKCKKKLLSLLHEFLQAEVQHQLDLEIKLHKKEELSEEGYLAQVQVQVLLNKLSLENGDHTLNQKVNQGLE  
Opossum 1b 1 -----E-C-KKKKLSLLHEFLQAEVQHQLDLEIKLHKKEELSEEGYLAQVQVQVLLNKLSLENGDHTLNQKVNQGLE  
Opossum 1ψ 1 -----  
Wallaby 1 1 MPARTGPAFVAAPGSPGLPLPPEVRRRLKDLKEDDILTEKEKTKKKLSLLHEFLQAEVQHQLDLEIKLHKKEELSEEGYLAQVQVQVLLNKLSLENGDHTLNPKKNGSLE  
Koala 1 1 MPARTGPAFVAAPGSPALQLPPEVRRRLKDLKEDDILTEKEKTKKKLSLLHEFLQAEVQHQLDLEIKLHKKEELSEEGYLAQVQVQVLLNKLSLENGDHTLNPKKNGSLE  
Tasmanian devil 1 1 -----LKDLKEDDILTEKEKTKKKLSLLHEFLQAEVQHQLDLEIKLHKKEELSEEGYLAQVQVQVLLNKLSLENGDHTLNPKKNGSLE  
Wallaby 2 1 MPARTGPAFVAAPGSPGLPLPPEVRRRLKDLKEDDILTEKEKTKKKLSLLHEFLQAEVQHQLDLEIKLHKKEELSEEGYLAQVQVQVLLNKLSLENGDHTLNPKKNGSLE  
Koala 2 1 -----  
Tasmanian devil 2 1 -----  
Platypus 1 MPARTAPTSPLPTL-----PLPPEVRRRLKDLKEDGSRTEKECKRREKLNLLHEFLQAEVQVQVLLNKLSLENGHAYNREVRNGRLE

Human 109 NGNQARSAA-----RRVGMAD--ANSPPKPLSKPRTPRRSKSDGBAKPEPSESPRITRKSSTHOTTITSHFAKGPAPKRKQPEESERAKSES--KE--B-KDQDEK  
Opossum 1a 111 NGTYTSDDDFEKSI---EEDSIVEMEE--ATGSSTLSLKRKPRRSKSDGBAKPEPSESPRITRKSSTHOTTITSHFAKGPAPKRKQPEESERAKSES--KE--B-KDQDEK  
Opossum 1b 70 NGTYTSDDDFEKSI---E--SAVEMEE--ATGSSTLSLKRKPRRSKSDGBAKPEPSESPRITRKSSTHOTTITSHFAKGPAPKRKQPEESERAKSES--KE--B-KDQDEK  
Opossum 1ψ 1 -----  
Wallaby 1 111 NGTYTSDDDFEKSI---EEDSIVEMEE--ATGSSTLSLKRKPRRSKSDGBAKPEPSESPRITRKSSTHOTTITSHFAKGPAPKRKQPEESERAKSES--KE--B-KDQDEK  
Koala 1 111 NGTYTSDDDFEKSI---EEDSIVEMEE--ATGSSTLSLKRKPRRSKSDGBAKPEPSESPRITRKSSTHOTTITSHFAKGPAPKRKQPEESERAKSES--KE--B-KDQDEK  
Tasmanian devil 1 84 NGTYTSDDDFEKSI---EEDSIVEMEE--ATGSSTLSLKRKPRRSKSDGBAKPEPSESPRITRKSSTHOTTITSHFAKGPAPKRKQPEESERAKSES--KE--B-KDQDEK  
Wallaby 2 111 NGTYTSDDDFEKSI---EEDSIVEMEE--ATGSSTLSLKRKPRRSKSDGBAKPEPSESPRITRKSSTHOTTITSHFAKGPAPKRKQPEESERAKSES--KE--B-KDQDEK  
Koala 2 1 -----  
Tasmanian devil 2 1 -----  
Platypus 106 NGAVVSDDELDLKSALDVEEDSTMDMEEAVSPSTSGSKPRKPRRSKNGENK--SPASSRVTRSSGKOPTIIVSLFSKSGIKRKRSEEVNGEIKQEMNVEKEED-LEEK---

Human 204 RRRVTSRERVARPLPAEPEPERAKSGTRTEKEEERDEKEERLRSQTKEPTPKQKLKEEPDREARAGVQADEDEDGDEKDEKHSRQPKDLAAKRPEEKEPEKVNQPOISD  
Opossum 1a 213 -----  
Opossum 1b 171 -----  
Opossum 1ψ 1 -----  
Wallaby 1 211 -----  
Koala 1 211 -----  
Tasmanian devil 1 183 -----  
Wallaby 2 213 -----  
Koala 2 1 -----  
Tasmanian devil 2 1 -----  
Platypus 212 -----

Human 314 EKDEDEK--EKKRRKTPKPEPE--KKMARAKT--VMNS--KTHPPKCMDCROYLDLDDPLKFGQDPDGDALDEPEMLTDERLSIFDANEDGFESYDLPQHRVTSFVSVDKKG  
Opossum 1a 213 -----E-QGEEKMKFEVKEGSEIKEVVQSKA--VLEFV--KSTPPKCMDCROYLDLDDPLKFGQDPDGDALDEPEMLTDERLSIFDANEDGFESYDLPQHRVTSFVSVDKKG  
Opossum 1b 171 -----E-RGGKMKFEVKEGSEIKEVVQSKA--VLEFV--KSTPPKCMDCROYLDLDDPLKFGQDPDGDALDEPEMLTDERLSIFDANEDGFESYDLPQHRVTSFVSVDKKG  
Opossum 1ψ 1 -----APSLOC--NCLRFQDDPLKFGQDPDGDALDEPEMLTDERLSIFDANEDGFESYDLPQHRVTSFVSVDKKG  
Wallaby 1 211 -----E-QGEEKMKFEVKEGSEIKEVVQSKA--VLEFV--KSTPPKCMDCROYLDLDDPLKFGQDPDGDALDEPEMLTDERLSIFDANEDGFESYDLPQHRVTSFVSVDKKG  
Koala 1 211 -----E-QGEEKMKFEVKEGSEIKEVVQSKA--VLEFV--KSTPPKCMDCROYLDLDDPLKFGQDPDGDALDEPEMLTDERLSIFDANEDGFESYDLPQHRVTSFVSVDKKG  
Tasmanian devil 1 183 -----E-QGEEKMKFEVKEGSEIKEVVQSKA--VLEFV--KSTPPKCMDCROYLDLDDPLKFGQDPDGDALDEPEMLTDERLSIFDANEDGFESYDLPQHRVTSFVSVDKKG  
Wallaby 2 213 -----XXXXXXXXXXXXXXXXXXXXXXXXXXXXXXXXXXXXXXXXXXXXXXXXXXXXXXXXXXXXXXXXXXXXXXXXXXXXXXXXXXXXXXXXXXXXXXXXXXXXXXXXXXXX  
Koala 2 1 -----Y-P--QCPCQLQYINDPDLKHLGDPDGDALDEPEMLTDERLSIFDANEDGFESYDLPQHRVTSFVSVDKKG  
Tasmanian devil 2 1 -----LEAEMLADKLCIFDSEKGFESYDLPQHRVTSFVSVDKKG  
Platypus 212 -----E-QEKRRIKLEAKEGSEV--EETVVKVPAKSTPPKCMDCROYLDLDDPLKFGQDPDGDALDEPEMLTDERLSIFDANEDGFESYDLPQHRVTSFVSVDKKG

Human 418 HLCFPTDGLTEKNIELFSGVAKPIYDDNPSLGGVGNKLNLPINPWWITGFDGGEKALIGFTTAFADYILMASEEYAPIFALMOEKIYMSKIVVEFLQNNPVSYEDL  
Opossum 1a 314 HLCFPTDGLTEKNIELFSGVAKPIYDDNPSLGGVGNKLNLPINPWWITGFDGGEKALIGFTTAFADYILMASEEYAPIFALMOEKIYMSKIVVEFLQNNPVSYEDL  
Opossum 1b 272 HLCFPTDGLTEKNIELFSGVAKPIYDDNPSLGGVGNKLNLPINPWWITGFDGGEKALIGFTTAFADYILMASEEYAPIFALMOEKIYMSKIVVEFLQNNPVSYEDL  
Opossum 1ψ 72 HLCFPTDGLTEKNIELFSGVAKPIYDDNPSLGGVGNKLNLPINPWWITGFDGGEKALIGFTTAFADYILMASEEYAPIFALMOEKIYMSKIVVEFLQNNPVSYEDL  
Wallaby 1 312 HLCFPTDGLTEKNIELFSGVAKPIYDDNPSLGGVGNKLNLPINPWWITGFDGGEKALIGFTTAFADYILMASEEYAPIFALMOEKIYMSKIVVEFLQNNPVSYEDL  
Koala 1 312 HLCFPTDGLTEKNIELFSGVAKPIYDDNPSLGGVGNKLNLPINPWWITGFDGGEKALIGFTTAFADYILMASEEYAPIFALMOEKIYMSKIVVEFLQNNPVSYEDL  
Tasmanian devil 1 283 HLCFPTDGLTEKNIELFSGVAKPIYDDNPSLGGVGNKLNLPINPWWITGFDGGEKALIGFTTAFADYILMASEEYAPIFALMOEKIYMSKIVVEFLQNNPVSYEDL  
Wallaby 2 314 XXXXXXXXXXXXXXXXXXXXXXXXXXXXXXXXXXXXXXXXXXXXXXXXXXXXXXXXXXXXXXXXXXXXXXXXXXXXXXXXXXXXXXXXXXXXXXXXXXXXXXXXXXXXXXX  
Koala 2 70 HLCFPTDGLTEKNIELFSGVAKPIYDDNPSLGGVGNKLNLPINPWWITGFDGGEKALIGFTTAFADYILMASEEYAPIFALMOEKIYMSKIVVEFLQNNPVSYEDL  
Tasmanian devil 2 44 HLCFPTDGLTEKNIELFSGVAKPIYDDNPSLGGVGNKLNLPINPWWITGFDGGEKALIGFTTAFADYILMASEEYAPIFALMOEKIYMSKIVVEFLQNNPVSYEDL  
Platypus 314 HLCFPTDGLTEKNIELFSGVAKPIYDDNPSLGGVGNKLNLPINPWWITGFDGGEKALIGFTTAFADYILMASEEYAPIFALMOEKIYMSKIVVEFLQNNPVSYEDL

Human 528 INKIETTVPAGLNFRFTEDSLRHAQFVVEQVESYDEAGDSDEQPIVITPCMRDLIKLAGVTLGKRRARRQAIRRPTKI DDKRGPTKATTTKLVYLFDTFFSBOI  
Opossum 1a 424 INKIETTVPAGLNFRFTEDSLRHAQFVVEQVESYDEAGDSDEQPIVITPCMRDLIKLAGVTLGKRRARRQAIRRPTKI DDKRGPTKATTTKLVYLFDTFFSBOI  
Opossum 1b 382 INKIETTVPAGLNFRFTEDSLRHAQFVVEQVESYDEAGDSDEQPIVITPCMRDLIKLAGVTLGKRRARRQAIRRPTKI DDKRGPTKATTTKLVYLFDTFFSBOI  
Opossum 1ψ 181 HQIE-----X\*AR--Q--I--H--TKKQKIKR--PTKVT--TTKLVYQIFD--F--SBOI  
Wallaby 1 422 INKIETTVPAGLNFRFTEDSLRHAQFVVEQVESYDEAGDSDEQPIVITPCMRDLIKLAGVTLGKRRARRQAIRRPTKI DDKRGPTKATTTKLVYLFDTFFSBOI  
Koala 1 422 INKIETTVPAGLNFRFTEDSLRHAQFVVEQVESYDEAGDSDEQPIVITPCMRDLIKLAGVTLGKRRARRQAIRRPTKI DDKRGPTKATTTKLVYLFDTFFSBOI  
Tasmanian devil 1 393 INKIETTVPAGLNFRFTEDSLRHAQFVVEQVESYDEAGDSDEQPIVITPCMRDLIKLAGVTLGKRRARRQAIRRPTKI DDKRGPTKATTTKLVYLFDTFFSBOI  
Wallaby 2 424 XXXXXXXXXXXXXXXXXXXXXXXXXXXXXXXXXXXXXXXXXXXXXXXXXXXXXXXXXXXXXXXXXXXXXXXXXXXXXXXXXXXXXXXXXXXXXXXXXXXXXXXXXXXXXXX  
Koala 2 180 INATEKTKPPGLNFRFTEDSLRHAQFVVEQVESYDEAGDSDEQPIVITPCMRDLIKLAGVTLGKRRARRQAIRRPTKI DDKRGPTKATTTKLVYLFDTFFSBOI  
Tasmanian devil 2 154 IQNIEBNNVPPGLNFRFTEDSLRHAQFVVEQVESYDEAGDSDEQPIVITPCMRDLIKLAGVTLGKRRARRQAIRRPTKI DDKRGPTKATTTKLVYLFDTFFSBOI  
Platypus 424 INKIETTVPAGLNFRFTEDSLRHAQFVVEQVESYDEAGDSDEQPIVITPCMRDLIKLAGVTLGKRRARRQAIRRPTKI DDKRGPTKATTTKLVYLFDTFFSBOI

Human 637 EKDR--EDK---ENAKRRRCVCEVCOQPECGKCKACQDMVKFGGSRGSKQACLRRCRCPNLAVKAEADEDEVDNIPEMPSPKMLQCKKKQNKTRISWVCAPIKSD  
Opossum 1a 533 EKNEREDDK---ENAMKRRRCVCEVCOQPECGKCKACQDMVKFGGSRGSKQACLRRCRCPNLAVKAEADEDEVDNIPEMPSPKMLQCKKKQNKTRISWVCAPIKSD  
Opossum 1b 491 EKNER--EDK---ENAMKRRRCVCEVCOQPECGKCKACQDMVKFGGSRGSKQACLRRCRCPNLAVKAEADEDEVDNIPEMPSPKMLQCKKKQNKTRISWVCAPIKSD  
Opossum 1ψ 224 DKQGREBEK---ESFMRRCPCGICBFCQOPECGKCKACQDMVKFGGSRGSKQACLRRCRCPNLAVKAEADEDEVDNIPEMPSPKMLQCKKKQNKTRISWVCAPIKSD  
Wallaby 1 531 EKNEREDDK---ENAMKRRRCVCEVCOQPECGKCKACQDMVKFGGSRGSKQACLRRCRCPNLAVKAEADEDEVDNIPEMPSPKMLQCKKKQNKTRISWVCAPIKSD  
Koala 1 531 EKNEREDDK---ENAMKRRRCVCEVCOQPECGKCKACQDMVKFGGSRGSKQACLRRCRCPNLAVKAEADEDEVDNIPEMPSPKMLQCKKKQNKTRISWVCAPIKSD  
Tasmanian devil 1 502 EKNEREDDK---ENAMKRRRCVCEVCOQPECGKCKACQDMVKFGGSRGSKQACLRRCRCPNLAVKAEADEDEVDNIPEMPSPKMLQCKKKQNKTRISWVCAPIKSD  
Wallaby 2 533 KNGQDDEG---TAVKRRRCVCEVCOQPECGKCKACQDMVKFGGSRGSKQACLRRCRCPNLAVKAEADEDEVDNIPEMPSPKMLQCKKKQNKTRISWVCAPIKSD  
Koala 2 289 DRSGKDKNGKDEAD---TAVKRRRCVCEVCOQPECGKCKACQDMVKFGGSRGSKQACLRRCRCPNLAVKAEADEDEVDNIPEMPSPKMLQCKKKQNKTRISWVCAPIKSD  
Tasmanian devil 2 262 DKNGKDESE---GAL--KRRRCVCEVCOQPECGKCKACQDMVKFGGSRGSKQACLRRCRCPNLAVKAEADEDEVDNIPEMPSPKMLQCKKKQNKTRISWVCAPIKSD  
Platypus 533 EKNEREDDK---ENAMKRRRCVCEVCOQPECGKCKACQDMVKFGGSRGSKQACLRRCRCPNLAVKAEADEDEVDNIPEMPSPKMLQCKKKQNKTRISWVCAPIKSD

Human 742 GKKSYYKVCIDSEITLEVGDVSVSPDDPTKPLYLARITALWEDSSNGQMFHAHWFACAGIDTVLGATSDPDLFLVDECEDMQLSYIHGKVNVIYKAPSNWMSMEGGLDM  
Opossum 1a 639 GKGDYYQKVCIDSEITLEVGDVSVSPDDPTKPLYLARITALWEDSSNGQMFHAHWFACAGIDTVLGATSDPDLFLVDECEDMQLSYIHGKVNVIYKAPSNWMSMEGGLDM  
Opossum 1b 596 GKGDYYQKVCIDSEITLEVGDVSVSPDDPTKPLYLARITALWEDSSNGQMFHAHWFACAGIDTVLGATSDPDLFLVDECEDMQLSYIHGKVNVIYKAPSNWMSMEGGLDM  
Opossum 1ψ 329 GARNYYQIHYINHEIYQVGDVSVSPDDPTKPLYLARITALWEDSSNGQMFHAHWFACAGIDTVLGATSDPDLFLVDECEDMQLSYIHGKVNVIYKAPSNWMSMEGGLDM  
Wallaby 1 637 GKGDYYQKVCIDSEITLEVGDVSVSPDDPTKPLYLARITALWEDSSNGQMFHAHWFACAGIDTVLGATSDPDLFLVDECEDMQLSYIHGKVNVIYKAPSNWMSMEGGLDM  
Koala 1 637 GKGDYYQKVCIDSEITLEVGDVSVSPDDPTKPLYLARITALWEDSSNGQMFHAHWFACAGIDTVLGATSDPDLFLVDECEDMQLSYIHGKVNVIYKAPSNWMSMEGGLDM  
Tasmanian devil 1 608 GKGDYYQKVCIDSEITLEVGDVSVSPDDPTKPLYLARITALWEDSSNGQMFHAHWFACAGIDTVLGATSDPDLFLVDECEDMQLSYIHGKVNVIYKAPSNWMSMEGGLDM  
Wallaby 2 638 XXXXXXXXXXXXXXXXXXXXXXXXXXXXXXXXXXXXXXXXXXXXXXXXXXXXXXXXXXXXXXXXXXXXXXXXXXXXXXXXXXXXXXXXXXXXXXXXXXXXXXXXXXXXXXX  
Koala 2 398 EBRNYYEMVINSSEKIQVGDVSVSPDDPTKPLYLARITALWEDSSNGQMFHAHWFACAGIDTVLGATSDPDLFLVDECEDMQLSYIHGKVNVIYKAPSNWMSMEGGLDM  
Tasmanian devil 2 366 EBRNYYEMVINSSEKIQVGDVSVSPDDPTKPLYLARITALWEDSSNGQMFHAHWFACAGIDTVLGATSDPDLFLVDECEDMQLSYIHGKVNVIYKAPSNWMSMEGGLDM  
Platypus 639 GKGDYYQKVCIDSEITLEVGDVSVSPDDPTKPLYLARITALWEDSSNGQMFHAHWFACAGIDTVLGATSDPDLFLVDECEDMQLSYIHGKVNVIYKAPSNWMSMEGGLDM
