# Supplementary material for: Molecular evolution of DNMT1 in vertebrates: Duplications in marsupials followed by positive selection
Source: PubMed Central journal article supplement (PMC5886458; doi:10.1371/journal.pone.0195162), 2018-04-05

# Tasmanian devil scaffold GL841374.1

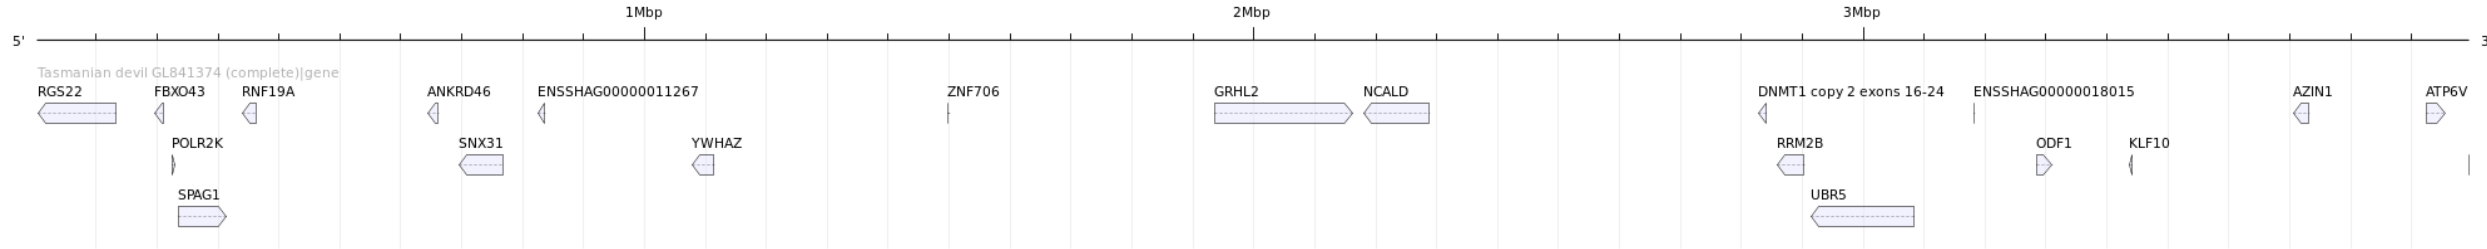

Supplement: pone.0195162.s003.pdf [file pone.0195162.s003.pdf]
