# Supplementary material for: Molecular evolution of DNMT1 in vertebrates: Duplications in marsupials followed by positive selection
Source: PLoS One. 2018 Apr 5;13(4):e0195162. doi: 10.1371/journal.pone.0195162 (PMC5886458; doi:10.1371/journal.pone.0195162)
Supplement: S2 Fig — The human sequence corresponds to the Dnmt1s isoform. Dashes represent alignment gaps or missing regions. Stretches of “X” symbols represent unsequenced regions. Single “X” symbols represent incomplete codons (e.g., due to frameshift mutations). (PDF) [file pone.0195162.s002.pdf]

[illegible][illegible]

|                   |      | Exon 34                                                                                                       | Exon 35                                  |
|-------------------|------|---------------------------------------------------------------------------------------------------------------|------------------------------------------|
| Human             | 1288 | VRMGYQCTFGVLQAGQYGVAQTRRRRAILAAAPGEKLPFPELPHVFAPRACQLSVVDDKKFVSNITR                                           | SSGPFRTITVRDTSMDLPEIRNGASALEISYNGEPQSWFQ |
| Opossum 1a        | 1187 | VRMGYQCTFGVLQAGQYGVAQTRRRRAILAAAPGEKLPMPFPELPHVFAPRACQLSVVDDKKFVSNITRMSAPFRTITVRDTSMDLPEIRNGASALEISYNGEPQSWFQ |                                          |
| Opossum 1b        | 1140 | VRMGYQCTFGVLQAGQYGAQTRRRRAILAAAPGEKLPMPFPELPHVFAPRACQLSVVDDKKFVSNITRMSAPFRTITVRDTSMDLPEIRNGASALEISYNGEPQSWFQ  |                                          |
| Opossum 1ψ        | 791  | VRMGYHCTFGVLQAGQYGVAQTRRRRAILAAAPGEKLPMPFPELPHVFAPRACQLSVVDDKKFVSNITRMSAPFRTITVRDTSMDLPEIRNGASALEISYNGEPQSWFQ |                                          |
| Wallaby 1         | 1185 | VRMGYQCTFGVLQAGQYGVAQTRRRRAILAAAPGEKLPMPFPELPHVFAPRACQLSVVDDKKFVSNITRMSAPFRTITVRDTSMDLPEIRNGASALEISYNGEPQSWFQ |                                          |
| Koala 1           | 1185 | VRMGYQCTFGVLQAGQYGVAQTRRRRAILAAAPGEKLPMPFPELPHVFAPRACQLSVVDDKKFVSNITRMSAPFRTITVRDTSMDLPEIRNGASALEISYNGEPQSWFQ |                                          |
| Tasmanian devil 1 | 1156 | VRMGYQCTFGVLQAGQYGVAQTRRRRAILAAAPGEKLPMPFPELPHVFAPRACQLSVVDDKKFVSNITRMSAPFRTITVRDTSMDLPEIRNGASALEISYNGEPQSWFQ |                                          |
| Wallaby 2         | 1177 | VRMGYQCTFGVLQAGQYGAQTRRRRAILAAAPGEKLPMPFPELPHVFAPRACQLSVVDDKKFVSNITRMSAPFRTITVRDTSMDLPEIRNGASALEISYNGEPQSWFQ  |                                          |
| Koala 2           | 937  | VRMGYQCTFGVLQAGQYGAQTRRRRAILAAAPGEKLPMPFPELPHVFAPRACQLSVVDDKKFVSNITRMSAPFRTITVRDTSMDLPEIRNGASALEISYNGEPQSWFQ  |                                          |
| Tasmanian devil 2 | 902  | VRMGYQCTFGVLQAGHYGAQTRRRRAILAAAPGEKLPMPFPELPHVFAPRACQLSVVDDKKFVSNITRMSAPFRTITVRDTSMDLPEIRNGASALEISYNGEPQSWFQ  |                                          |
| Platypus          | 1188 | VRMGYQCTFGVLQAGQYGVAQTRRRRAILAAAPGEKLPMPFPELPHVFAPRACQLSVVDDKKFVSNITRMSAPFRTITVRDTSMDLPEIRNGASALEISYNGEPQSWFQ |                                          |

|                   |      |    | Exon 38               |                                                                                            | Exon 39 |  | Exon 40 |  |
|-------------------|------|----|-----------------------|--------------------------------------------------------------------------------------------|---------|--|---------|--|
| Human             | 1508 | NH | WAGLYGRLEWDGFFSTTVTNP | PEPMKGQGRVLHPEQHRVVSRECARSQGFDPDYRLFGNLDKHKRQVGNAVPPPLAKAIGLEIKLCVLAKEKESAKIKEEBAAK-D      |         |  |         |  |
| Opossum 1a        | 1406 | NH | WAGLYGRLEWDGFFSTTVTNP | PEPMKGQGRVLHPEQHRVVSRECARSQGFDPDYRLFGNLDKHKRQVGNAVPPPLAKAIGLEIKLCVLAKLKENATEKIKQHFFS-TD    |         |  |         |  |
| Opossum 1b        | 1359 | NH | WAGLYGRLEWDGFFSTTVTD  | PEPMCNGRVLHPEQHRVVSRECARSQGFDPDYRFCCYLPDKHQVGNAVPPPLAKATGLEIKLCVLAKLKENAT-----             |         |  |         |  |
| Opossum 1ψ        | 1010 | NH | WAGLYGRLEWDGFFSTTVTD  | PEPMCNGRVLHPEQHRVVSRECARSQGFDPDYRYLFGNLDKHKRGCGNAVSPPLAKAIGLEIKLCVLA VKGGYYG*KIKQSHFFS-TD  |         |  |         |  |
| Wallaby 1         | 1404 | NH | WAGLYGRLEWDGFFSTTVTNP | PEPMKGQGRVLHPEQHRVVSRECARSQGFDPDYRLFGNLDKHKRQVGNAVPPPLAKAIGLEIKLCVLA TLKENATEKIKQNFFS-TD   |         |  |         |  |
| Koala 1           | 1404 | NH | WAGLYGRLEWDGFFSTTVTNP | PEPMKGQGRVLHPEQHRVVSRECARSQGFDPDYRLFGNLDKHKRQVGNAVPPPLAKATGLEIKLCVLA I LKENAEKIKQN NLKS-TD |         |  |         |  |
| Tasmanian devil 1 | 1375 | NH | WAGLYGRLEWDGFFSTTVTNP | PEPMKGQGRVLHPEQHRVVSRECARSQGFDPDYRLFGNLDKHKRQVGNAVPPPLAKAIGLEIKFSLVKLKKKEKATEKIKKNLSMD     |         |  |         |  |
| Wallaby 2         | 1395 | NH | WAGLYGRLEWDGFFSTTVTD  | PEPMKGQGVTHPEQHRVVSRECARSQGLPSYRFVSGTSKHKRQVGNAVPPPLAKAIGLEIKLCVLA LKKETAVKITTEV*-         |         |  |         |  |
| Koala 2           | 1156 | NH | WAGLYGRLEWDGFFSTTVTD  | PEPMCNGRVLHPEQHRVVSRECARSQGFDPDYRYLVGTLTKHKRQVGNAVPPPLAKATGLEIKLCVLA KLKENT-----           |         |  |         |  |
| Tasmanian devil 2 | 1121 | NH | WAGLYGRLEWDGFFSTTVTD  | PEPMKGQGRVLHPEQHRVVSRECARSQGFDPDYRLFSGTLTKHKRQVGNAVPPPLAKA IGLEIKNS LA RL ECH-----         |         |  |         |  |
| Platypus          | 1407 | NH | WAGLYGRLEWDGFFSTTVTNP | PEPMKGQGRVLHPEQHRVVSRECARSQGFDPDYRLFGNLDKHKRQVGNAVPPPLAKSLDGELICVLA LKENS LDNLK KMEITD     |         |  |         |  |
